# Supplementary material
Source: PubMed Central journal article supplement (PMC8686042)
Supplement: NIHPP2021.11.23.469747V2-supplement-1.pdf [file NIHPP2021.11.23.469747V2-supplement-1.pdf]

Figure S1

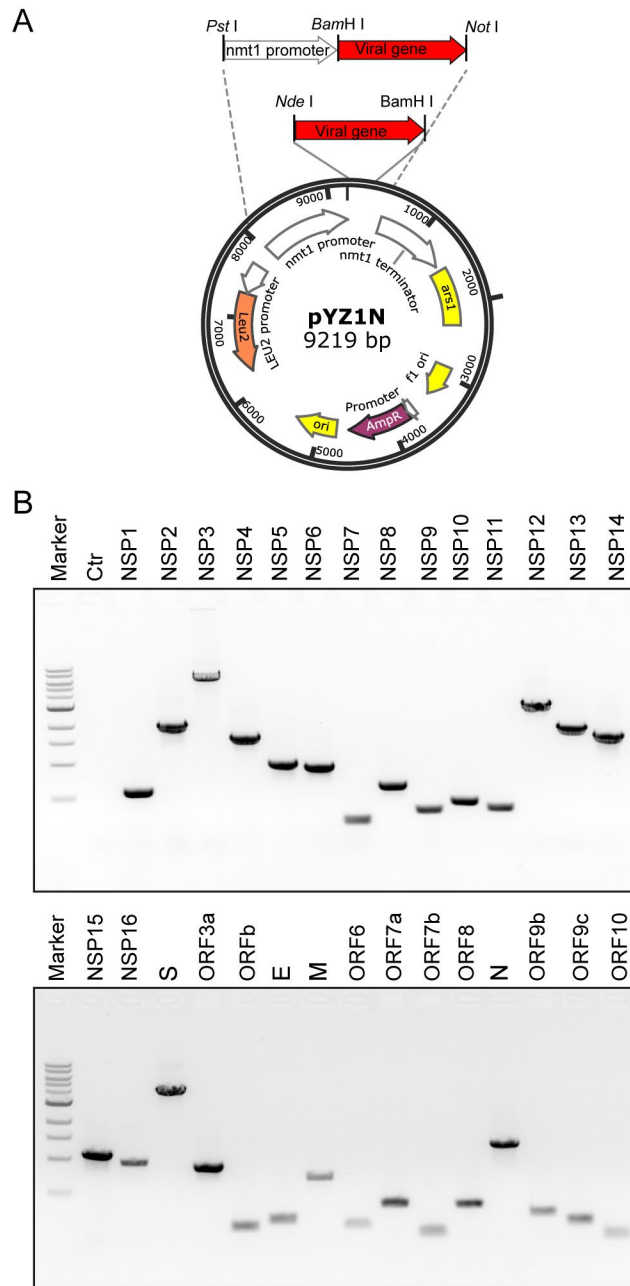

Figure S2

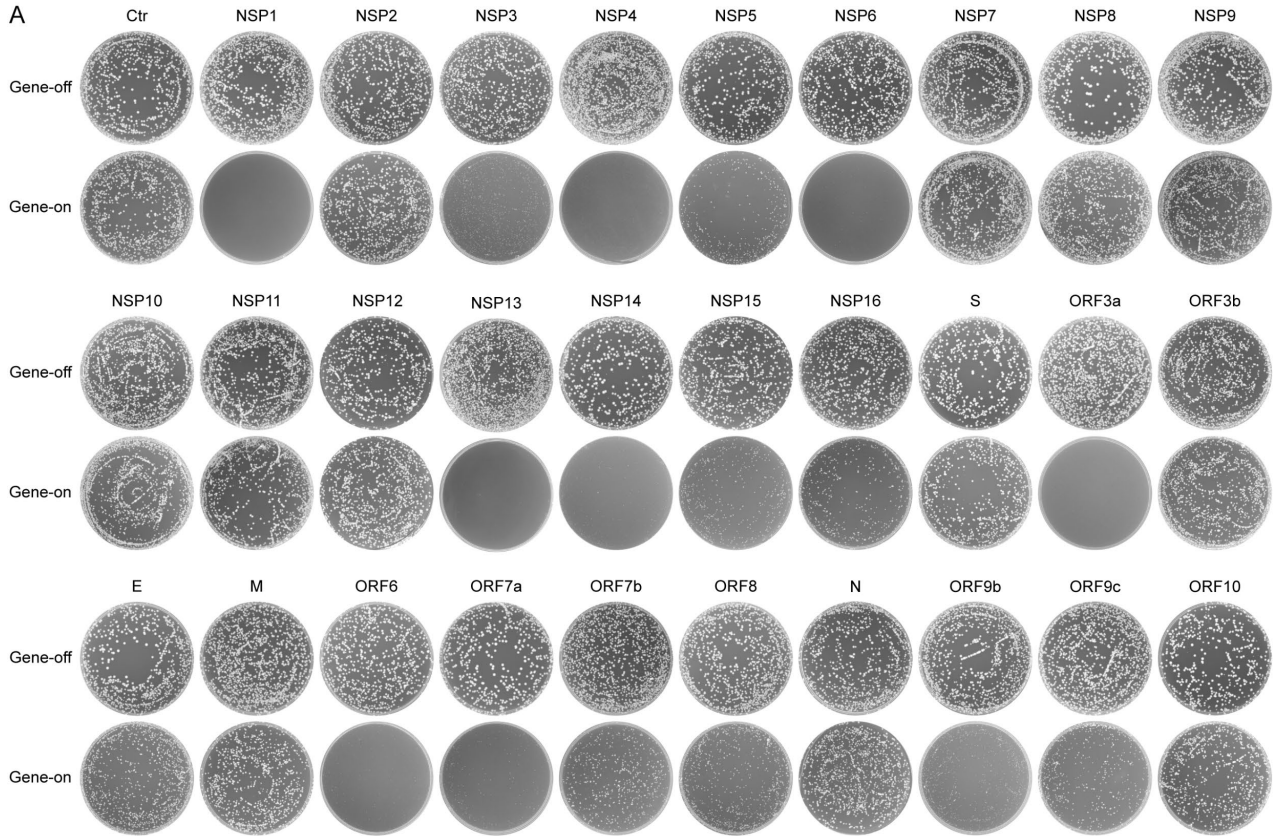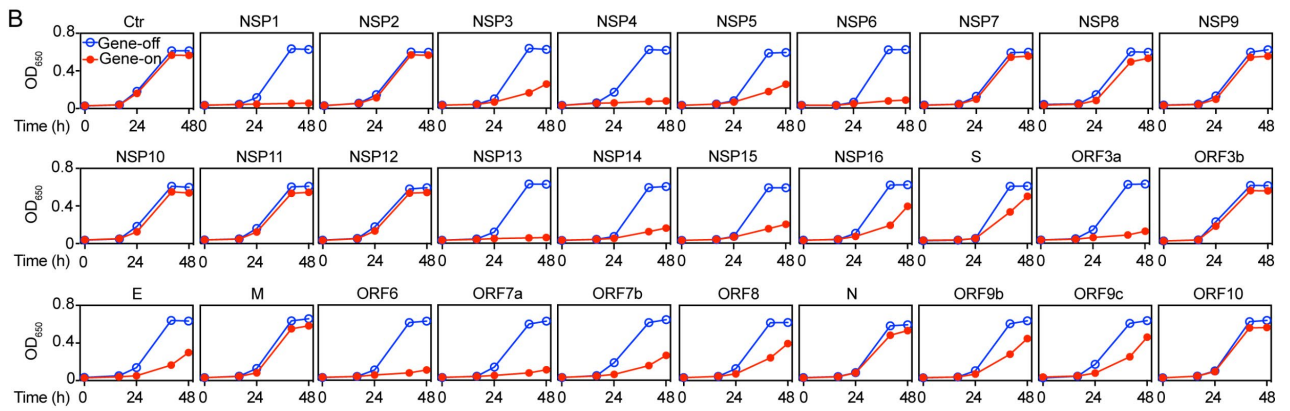





Figure S4

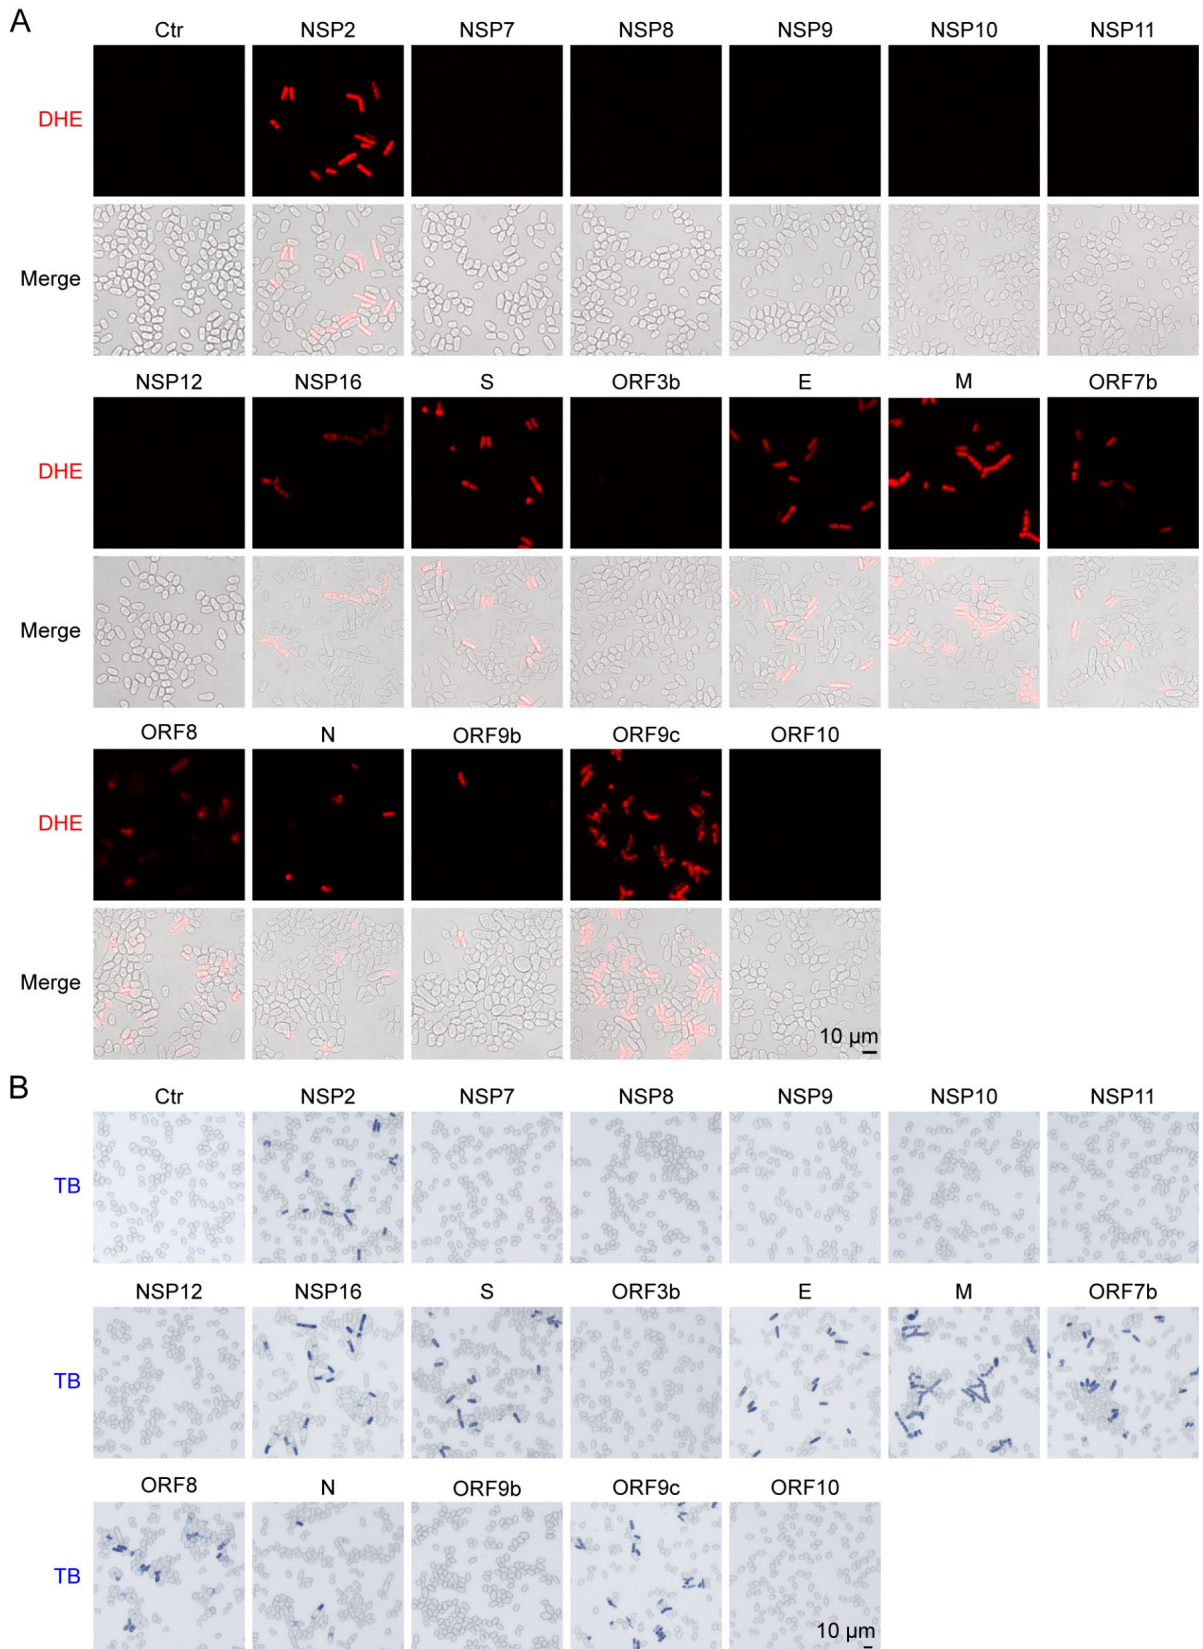

**Table S1.** Primers used for gene cloning in this study.

| Name    | Sequence (5' to 3')                                               |
|---------|-------------------------------------------------------------------|
| NSP1-F  | CTCG <b>CATATG</b> GAGAGTCTTGTACCCGGCTTTAAC                       |
| NSP1-R  | TCGC <b>GGATCC</b> TTAGCCGCCGTTTCAGTTTCGCGCATC                    |
| NSP2-F  | CTCG <b>CATATG</b> GCCTACACGCGATATGTTGAC                          |
| NSP2-R  | TCGC <b>GGATCC</b> TTAGCCGCCCTTAAGGGTAAAGGTG                      |
| NSP3-F  | CTCG <b>CATATG</b> GCCCCTACCAAGGTGACCTTCG                         |
| NSP3-R  | TCGC <b>AGATCT</b> TTATCCGCCCTTCAGGGCGATCTTGG                     |
| NSP4-F  | CTCG <b>CATATG</b> AAGATTGTAAACAATTGGCTTAAAC                      |
| NSP4-R  | TCGC <b>GGATCC</b> TTACTGGAGTACGGCTGAGGTTATG                      |
| NSP5-F  | CTCG <b>GGATCC</b> ATGTCTGGTTTTAGGAAAATGGCGTTC                    |
| NSP5-R  | CTGTC <b>GCGGCCGC</b> TTACTGGAAAGTGACCCCACTGCA                    |
| NSP6-F  | CTCG <b>CATATG</b> AGCGCGGTTAAACGGACCATAA                         |
| NSP6-R  | TCGC <b>GGATCC</b> TTACTGAACAGTCGCTACTTTAATACAAG                  |
| NSP7-F  | CTCG <b>CATATG</b> AGCAAGATGAGCGACGTAATAATG                       |
| NSP7-R  | TCGC <b>GGATCC</b> TTACTGCAATGTTCGCCGGTTGTC                       |
| NSP8-F  | CTCG <b>CATATG</b> GCAATCGCATCTGAATTTTCTAGTC                      |
| NSP8-R  | TCGC <b>GGATCC</b> TTACTGCAGTTTGACTGCGCTGTTAG                     |
| NSP9-F  | CTCG <b>CATATG</b> AATAATGAGCTTTCTCCGGTTGC                        |
| NSP9-R  | TCGC <b>GGATCC</b> TTATTGGAGTCGCACGGTCGCAGC                       |
| NSP10-F | CTCG <b>CATATG</b> GCTGGTAATGCAACTGAGGTTG                         |
| NSP10-R | TCGC <b>GGATCC</b> TTACTGCAACATCGGCTCTCGCAATT                     |
| NSP11-F | <b>TATG</b> TCAGCCGATGCGCAGTCTTTCTTGAACGGTTTCGCCGT <b>GTAAG</b>   |
| NSP11-R | GATC <b>TTACAC</b> GGCGAAACCGTTCAAGAAAGACTGCGCATCGGCTG <b>ACA</b> |
| NSP12-F | CTCG <b>GGATCC</b> ATGTCAGCAGACGCACAAAGTTTTTC                     |
| NSP12-R | CTGTC <b>GCGGCCGC</b> TTACTGCAGGACGGTGTGAGGCGTAT                  |
| NSP13-F | CTCG <b>CATATG</b> GCTGTTGGGGCGTGTGTGTTG                          |
| NSP13-R | TCGC <b>GGATCC</b> TTATTGAAGCGTCGCAACGTTTCCT                      |
| NSP14-F | CTCG <b>GGATCC</b> ATGGCTGAAAATGTAACGGGCTTG                       |
| NSP14-R | CTGTC <b>GCGGCCGC</b> TTACTGCAATCGGGTAAATGTGTTG                   |
| NSP15-F | CTCG <b>GGATCC</b> ATGAGTCTTGAAAACGTCGCCTTC                       |
| NSP15-R | CTGTC <b>GCGGCCGC</b> TTATTGCAACTTTGGATAGAAGGTCTC                 |
| NSP16-F | CTCG <b>CATATG</b> TCTTCCCAGGCTTGGCAGCCTG                         |
| NSP16-R | TCGC <b>GGATCC</b> TTAGTTGTTACCAGCACGTCAGAGG                      |
| S-F     | CTCG <b>GGATCC</b> ATGTTTGTCTTCTGGTTCTTTTGCCAC                    |
| S-R     | CTGTC <b>GCGGCCGC</b> TTACGTGTAGTGCAATTTTACGCC                    |
| ORF3a-F | CTCG <b>CATATG</b> GACCTTTTTATGAGAATCTTACCATC                     |
| ORF3a-R | TCGC <b>GGATCC</b> TTACAGGGGCACAGATGTGGTCGT                       |
| ORF3b-F | CTCG <b>CATATG</b> GCATACTGCTGGAGATGCACAAG                        |

ORF3b-R TCGC**GGATCC****TT**ACGGCCAGCAGCATCGAGCGAAAG  
E-F CTCG**CATATG**TACAGCTTCGTATCAGAAGAAACCG  
E-R TCGC**GGATCC****TT**AAACGAGGAGATCCGGCACCCCTG  
M-F CTCG**CATATG**GCCGACTCAAATGGGACCATTAC  
M-R TCGC**GGATCC****TT**ACTGGACGAGCAAAGCAATGTTATC  
ORF6-F CTCG**CATATG**TTTCATCTTGTCGATTTTCAAGTTACG  
ORF6-R TCGC**GGATCC****TT**AGTCTATTTCCATAGGCTGCTCC  
ORF7a-F CTCG**CATATG**AAGATCATTTTGTCTGGCCCTC  
ORF7a-R TCGC**GGATCC****TT**ACTCAGTCTTTCTTTTCAGTGTAAGC  
ORF7b-F CTCG**CATATG**ATTGAGCTGTCTCTCATCGATTTCT  
ORF7b-R TCGC**GGATCC****TT**AGGCGTGGCATGTCTCGTTATG  
ORF8-F CTCG**CATATG**AAGTTTCTCGTGTCTTGGGC  
ORF8-R TCGC**GGATCC****TT**ATATAAAGTCAAGGACCACCCTGAC  
N-F CTCG**GGATCC****ATG**AGCGATAACGGCCCCAAAAC  
N-R CTGTC**CGGGCCG****CTT**ACGCCTGAGTAGAATCGGCTGAG  
ORF9b-F CTCG**CATATG**GACCCCAAATTTCTGAAATGCACC  
ORF9b-R TCGC**GGATCC****TT**ACTTTACGGTTACTACCACAAATTCG  
ORF9c-F CTCG**CATATG**CTTCAATCCTGCTATAACTTCTTG  
ORF9c-R TCGC**GGATCC****TT**AATCCGTAAGACAGCAGCACAAC  
ORF10-F CTCG**CATATG**GGCTACATCAATGTCTTCGCCTT  
ORF10-R TCGC**GGATCC****TT**ATGTGAGATTGAAGTTTACAACATCG  
Pro<sub>nmt1</sub>-F CATGC**CTGCAG**GTCGATCGACTCTAGAGGATCAG  
Pro<sub>nmt1</sub>-R GGCG**GGATCC**ATTTAACAAGCGACTATAAGTCAG  
Sequencing-F TTCAATCTCATTCTCACTTTCTG  
Sequencing-R TGGGCTTCCATAGTTTGAAAGA  
ORF3a-F gtgtcgtgaggatctatttccggtgaattcgcgccaccATGGATTTGTTTATGAGAATC  
ORF3a-R gaattgtgatggctccatccccgcgccCtcgagCAAAGGCACGCTAGTAGTCG  
Q57H-F CACTTCTTGCTGTTTTTCAcAGCGCTTCCAAAATCATAAC  
Q57H-R TTATGATTTTGGAAAGCGCTgTGAAAAACAGCAAGAAGTGC  
ΔG188-R CCATTTTTTCAGTATAACCAATCTGGTAGTCATGTTT  
ΔG188-F CATGACTACCAGATTGGTTACTGAAAAATGGGAATCTG

---

The restriction sites were indicated in *italics* and the start and stop codon were indicated in **bold**. *Nde* I was indicated with red; *Bam*H I was indicated with blue; *Bgl* II was indicated with yellow; *Not* I was indicated orange, *Pst* I was indicated with green.

**Table S2.** Primers used for real-time PCR in this study.

| Name            | Sequence (5' to 3')      |
|-----------------|--------------------------|
| TNF $\alpha$ -F | CGAGTGACAAGCCTGTAGC      |
| TNF $\alpha$ -R | GGTGTGGGTGAGGAGCACAT     |
| IL-6-F          | AATAACCACCCCTGACCCAAC    |
| IL-6-R          | AATCTGAGGTGCCCATGCTAC    |
| NF $\kappa$ B-F | GAGCTCCGAGACAGTGACAG     |
| NF $\kappa$ B-R | TCTAGAGGTCCTTCCTGCCC     |
| IFNB1-F         | GGCAGTATTCAAGCCTCCCAT    |
| IFNB1-R         | TCTCCTGTTGTGCTTCTCCAC    |
| TLR3-F          | TCCAGGGTGTTTTACGCAA      |
| TLR3-R          | TGTGGAAGCCAAGCAAAGGA     |
| TLR4-F          | TGGAAGTTGAACGAATGGAATG   |
| TLR4-R          | ACCAGAACTGCTACAACAGATACT |
| <i>GAPDH-F</i>  | TGCACCACCAACTGCTTAG      |
| <i>GAPDH-R</i>  | AGTAGAGGCAGGGATGATGTTC   |
